# Supplementary material for: Low-Density Lipoprotein Receptor (LDLR) Is Involved in Internalization of Lentiviral Particles Pseudotyped with SARS-CoV-2 Spike Protein in Ocular Cells
Source: MDPI journal article supplement (doi:10.3390/ijms241411860), 2023-07-24
Supplement: s1 [file s1]

## Supplementary Figures and Tables

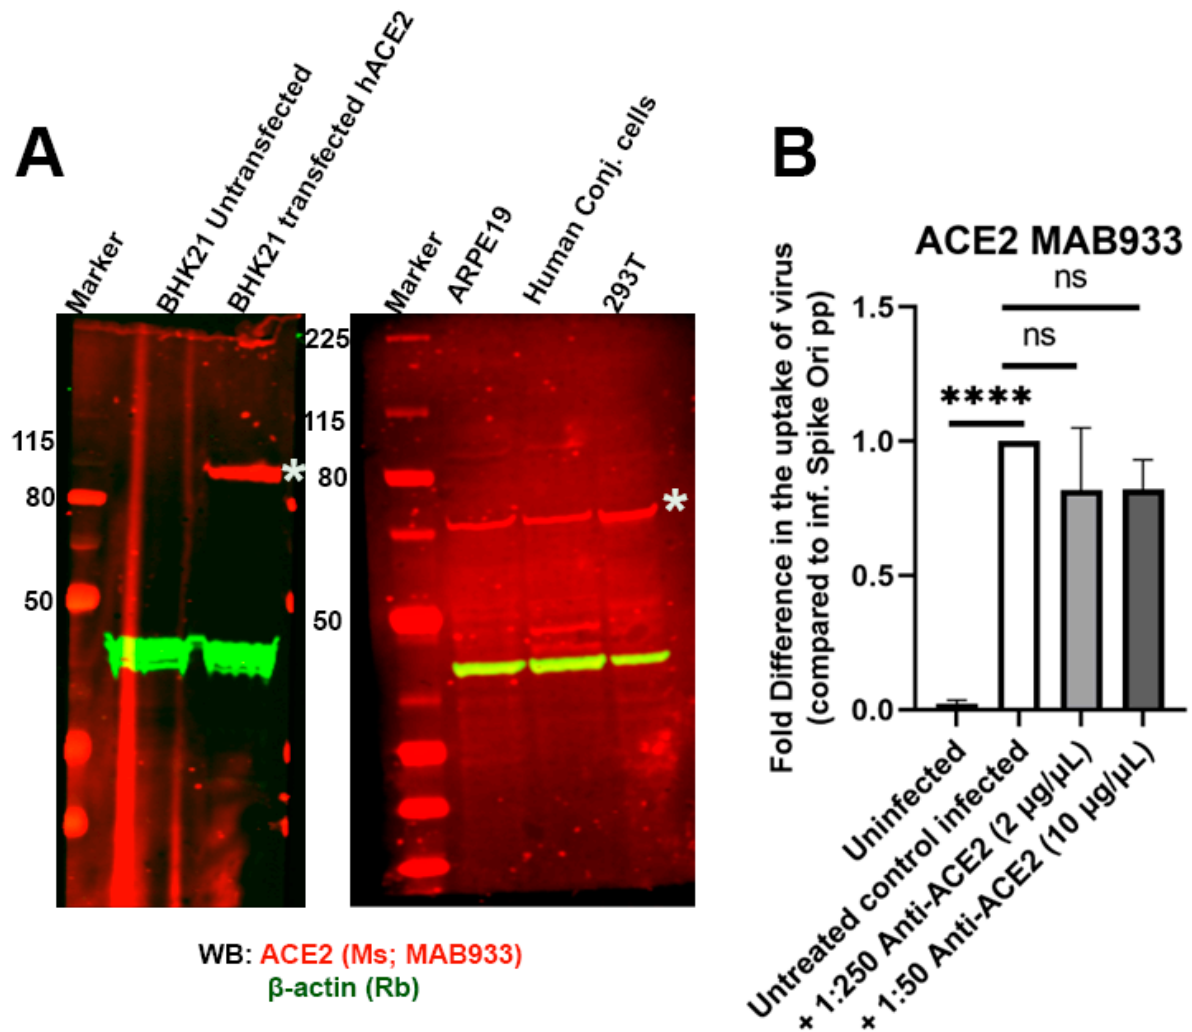

**Figure S1. A.** Expression of ACE2 (\*) (red) in different cell lines probed with anti-ACE2 antibodies (MAB933, 1:1000 dilution, 0.5 µg/mL). Expression of ACE2 in BHK21 cells untransfected or transfected with human ACE2 construct (left panel) and various other cell lines showing expression of ACE-2 protein (right panel). **B.** Blocking ACE2 does not affect pseudovirions uptake at MOI 10 in ARPE-19 cells. Fold difference in uptake of pseudovirions in the presence of 1:50 dilution (10 µg/mL) and 1:250 dilution (2 µg/mL) of MAB933 ACE2 antibody after 24 hours incubation. \*\*\*\*  $p < 0.0001$ .

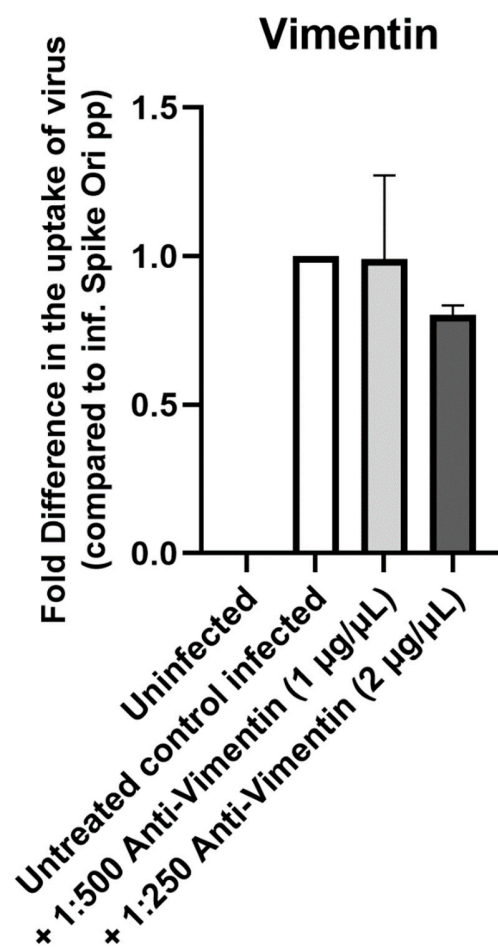

**Figure S2.** Antibody-mediated blocking of vimentin has no effect in blocking S protein pseudovirion infection of ARPE-19 cells. Fold difference in uptake of original spike-pseudotyped lentiviruses at MOI 10 in the presence of anti-vimentin antibody at 1:500 dilution (1 µg/mL) and 1:250 dilution (2 µg/mL) at 24 h compared to untreated controls infected with original spike protein pseudotyped particles alone.

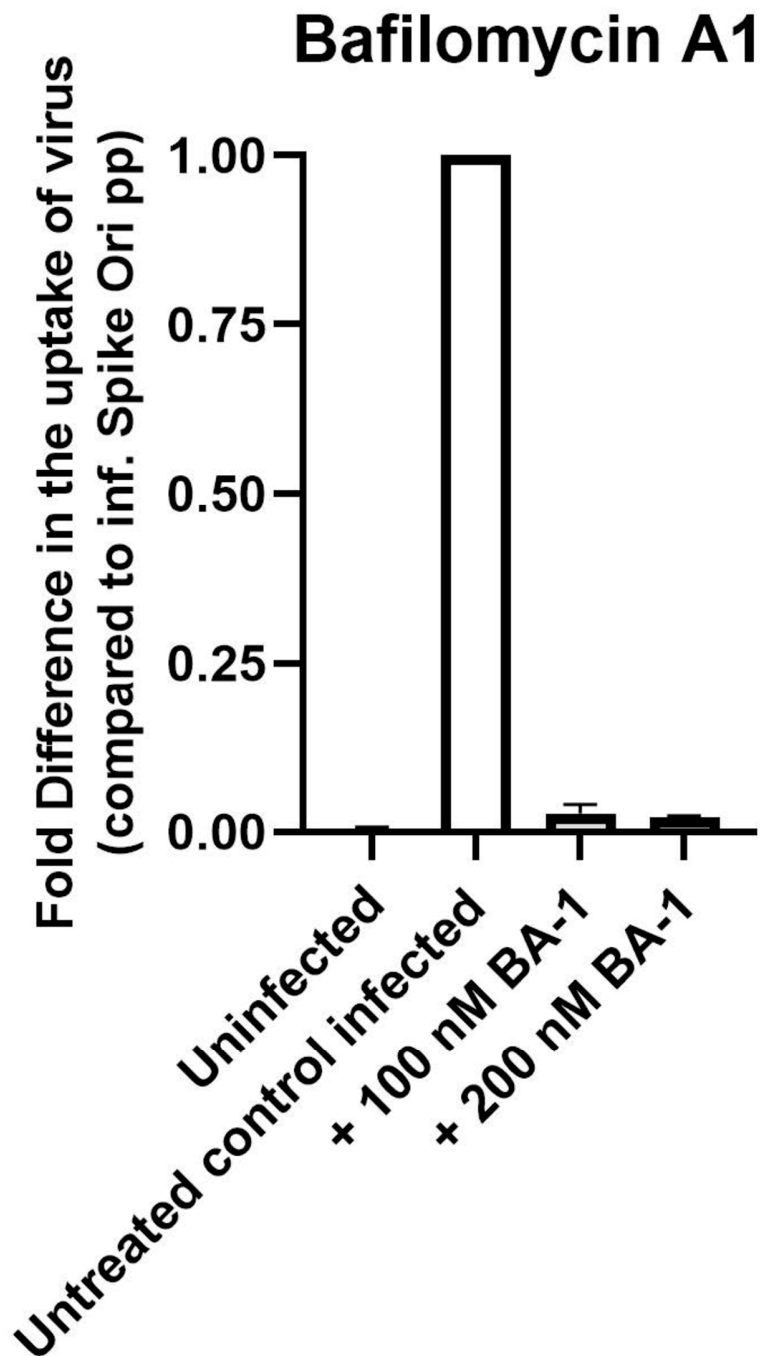

**Figure S3.** Bafilomycin A1, an agent for lysosomal alkalization, inhibits S protein pseudovirion infection of ARPE-19 cells. Fold difference in uptake of original spike-pseudotyped lentiviruses at MOI 10 in the presence of 100 nM and 200 nM concentrations of bafilomycin at 48 h compared to untreated controls infected with original spike protein pseudotyped particles alone.

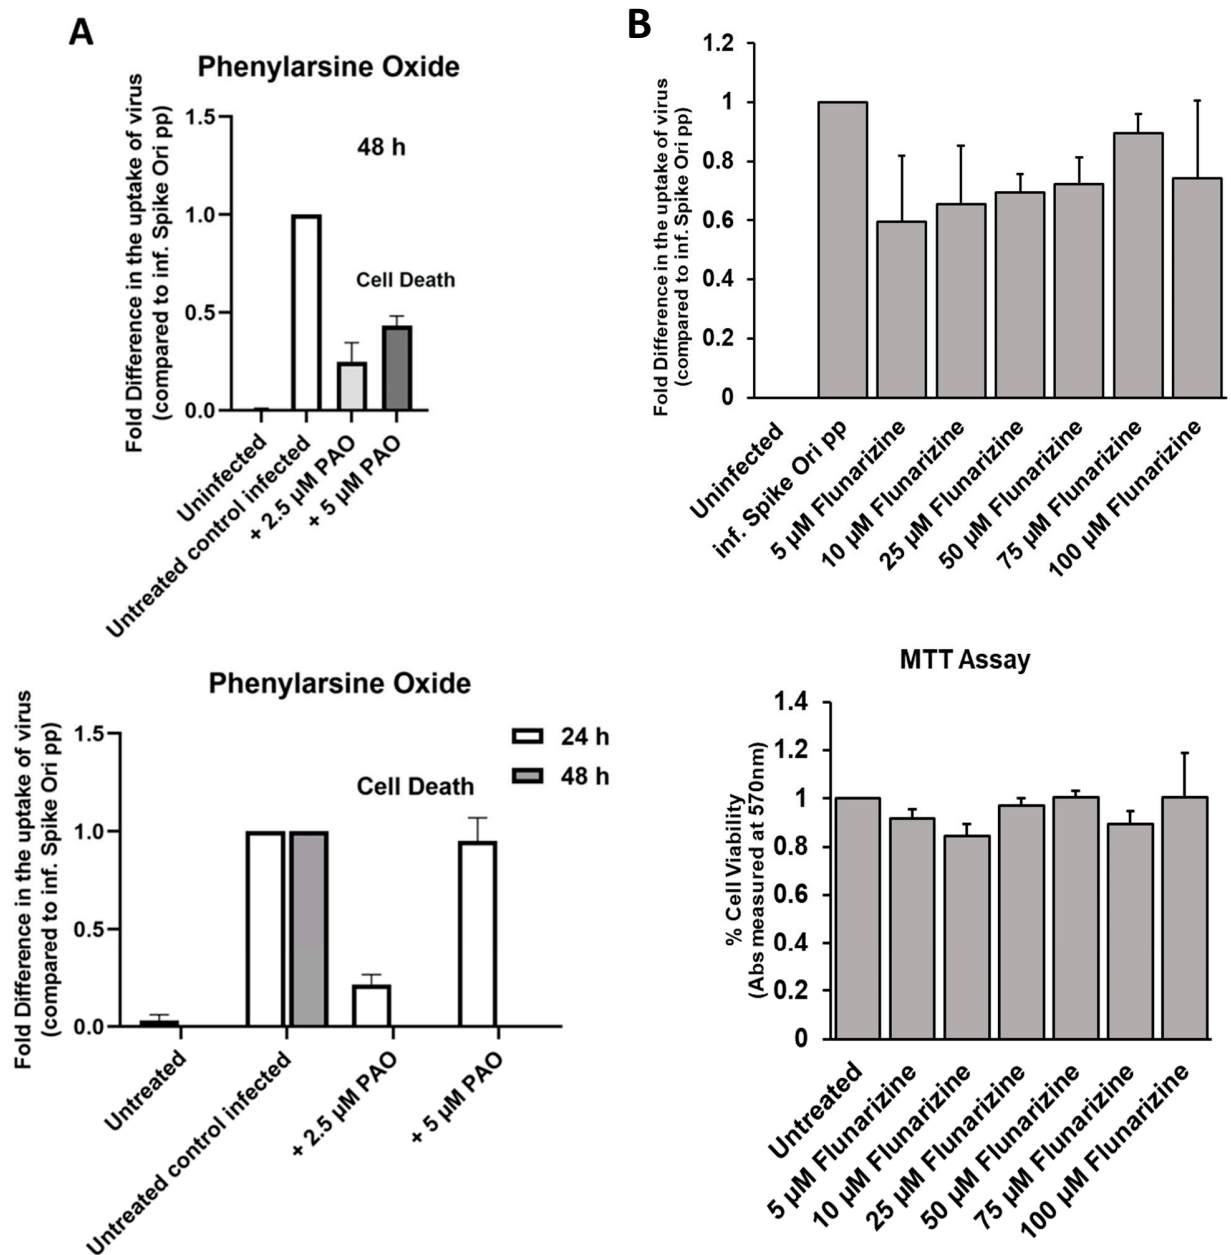

**Figure S4. A.** Effect of phenylarsine oxide (PAO), an inhibitor of clathrin-dependent endocytosis, in blocking S protein pseudovirion infection of ARPE-19 cells. Fold difference in uptake of original spike-pseudotyped lentiviruses at MOI 10 in the presence of 2.5  $\mu$ M and 5  $\mu$ M PAO at 48 h (top) and then repeated at 24 h and 48 h (bottom) compared to untreated controls infected with original spike protein pseudotyped particles alone. At the effective concentration of PAO, ARPE-19 cells showed significant cell death. **B.** Effect of flunarizine, T-type  $\text{Ca}^{2+}$  channel blocker and dynamin II GTPase activity inhibitor in blocking S protein pseudovirion infection of ARPE-19 cells at 48 h.

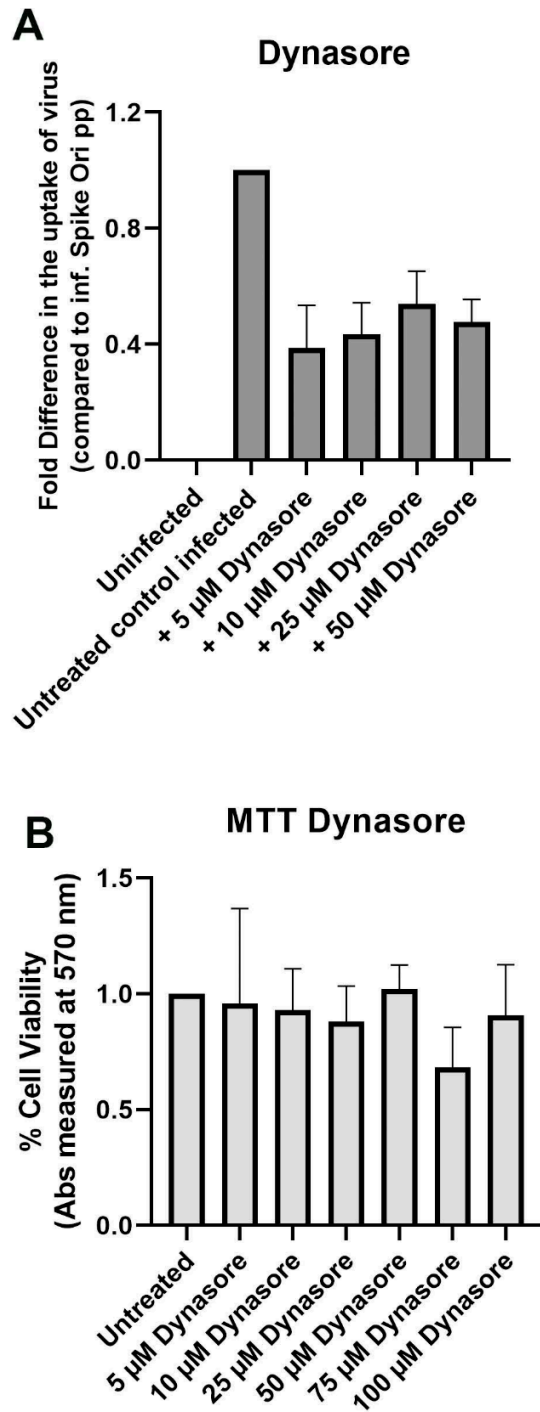

**Figure S5.** Dynasore, a noncompetitive inhibitor of dynamin GTPase activity, inhibits S protein pseudovirion infection of ARPE-19 cells. **A.** Fold difference in uptake of original spike-pseudotyped lentiviruses at MOI 10 in the presence of 5-50  $\mu$ M concentrations of dynasore at 48 h compared to untreated controls infected with original spike protein pseudotyped particles alone. **B.** (%) cell viability under the same conditions measured by MTT cell viability assay.

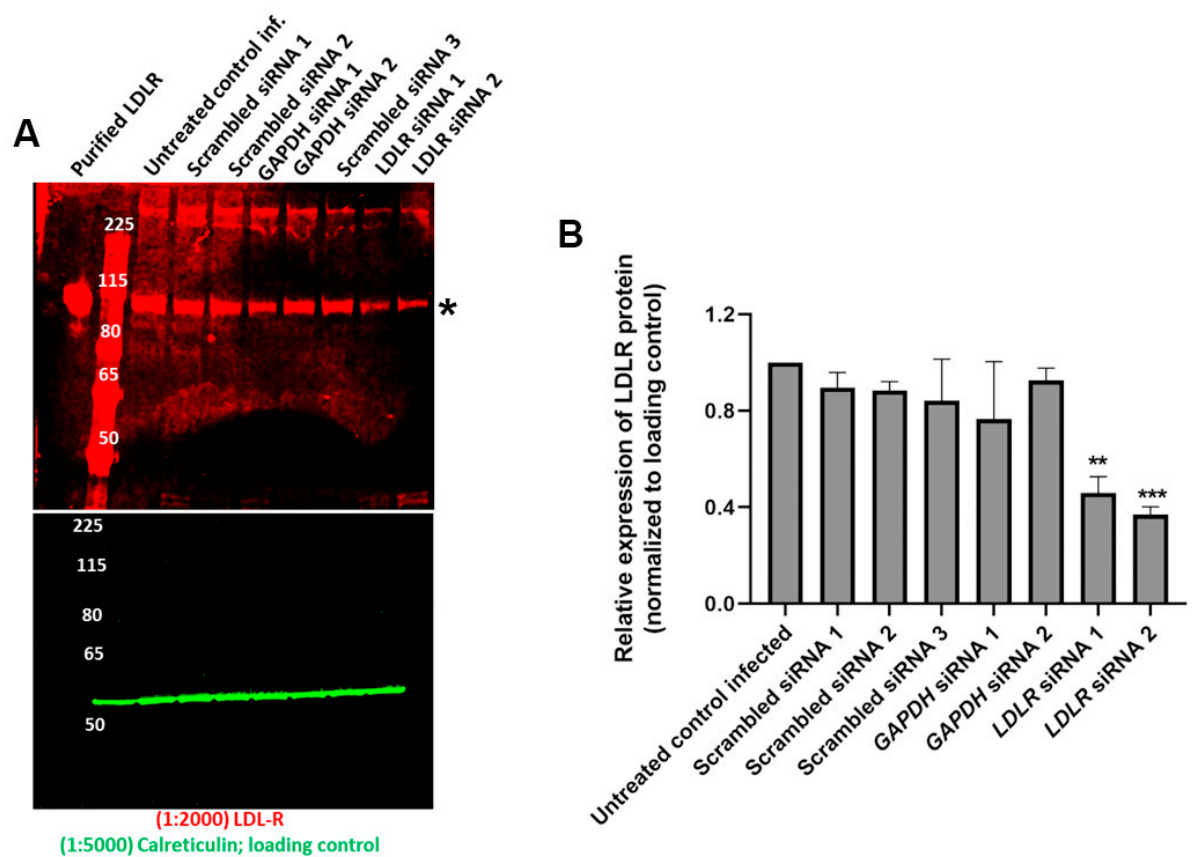

**Figure S6. A.** LDLR expression in ARPE-19 cells in the presence of various siRNAs.; immunoblot visualized with anti-LDLR monoclonal Abcam antibody (\*; red) and Goat Anti-Calreticulin antibody (green). **B.** Relative expression of LDLR protein normalized to calreticulin loading control. \*\*  $p < 0.001$ , \*\*\*  $p < 0.0005$ .

**Supplementary Table S1.** LDLR and scrambled LDLR siRNA sequences.

| Name             | SiRNA sequence (Sense) |
|------------------|------------------------|
| LDLR siRNA A     | CGAAUUCCAGUGCUCUGAUtt  |
| LDLR siRNA B     | GGAGUGAACUGGUGUGAGAtt  |
| Scrambled siRNA1 | ACCTCGGTCTATTAAGCTGtt  |
| Scrambled siRNA2 | GAGAACGTGGTCGTATGAGtt  |
| Scrambled siRNA3 | ATTCGACTTGGTGCGATTt    |

**Supplementary Table S2. A.** Selection for each codon estimated using the HyPhy model, LDLR alignment. dN is the ratio of non-synonymous mutations, dS is the ratio of synonymous mutations. Positive dN-dS indicate an excess of dN over dS (suggesting positive selection). Small P values indicate support of positive selection.

| Codon# | Codon Start | Triplet | dN-dS       | p-Value     |
|--------|-------------|---------|-------------|-------------|
| 3      | 7           | CCC     | 2.5         | 0.131687243 |
| 490    | 2353        | AGT     | 3.234241776 | 0.146741991 |
| 26     | 76          | AGA     | 2.500839556 | 0.14754001  |
| 183    | 547         | CGC     | 2.331346502 | 0.186728073 |
| 163    | 487         | CAG     | 2.134846117 | 0.282646669 |
| 498    | 2377        | GTC     | 1.844830362 | 0.302946438 |
| 12     | 34          | GTC     | 1.483332948 | 0.30639669  |
| 71     | 211         | GGG     | 1.888477342 | 0.312174014 |
| 49     | 145         | AGC     | 1.74042198  | 0.344458344 |
| 146    | 436         | CTC     | 1.498741511 | 0.351534331 |
| 185    | 553         | AGG     | 1.692795937 | 0.355655925 |
| 465    | 2068        | CAC     | 1.745733131 | 0.356706709 |
| 182    | 544         | CAG     | 1.737757155 | 0.359551108 |
| 328    | 1381        | GGC     | 1.403153159 | 0.361980158 |
| 188    | 571         | CAA     | 1.675603329 | 0.36719933  |
| 212    | 643         | CGC     | 1.391657611 | 0.3833148   |
| 2      | 4           | GGG     | 1.372496852 | 0.389630893 |
| 479    | 2116        | AGG     | 1.398150694 | 0.391770761 |
| 154    | 460         | CAG     | 1.569371806 | 0.40502763  |
| 451    | 2017        | AGC     | 1.269379729 | 0.424378612 |
| 35     | 103         | CAA     | 1.404910394 | 0.432915137 |
| 107    | 319         | AAG     | 1.344783572 | 0.432973246 |
| 245    | 1120        | GGC     | 1.310865417 | 0.443941435 |
| 110    | 328         | TCC     | 1           | 0.444444444 |
| 264    | 1189        | TCC     | 0.993085174 | 0.452754542 |
| 86     | 256         | TTC     | 1.302584868 | 0.45297263  |
| 55     | 163         | GGC     | 0.989648187 | 0.453790934 |
| 103    | 307         | GGC     | 0.9870611   | 0.456172824 |
| 333    | 1402        | GTC     | 0.98320435  | 0.459758639 |
| 59     | 175         | TCC     | 0.975280769 | 0.467259522 |
| 440    | 1984        | AGA     | 0.987981801 | 0.471626065 |
| 210    | 637         | AGC     | 1.278621068 | 0.478381561 |
| 123    | 367         | TCT     | 0.956390216 | 0.479634978 |
| 152    | 454         | AGC     | 1.26588504  | 0.492966262 |

|     |      |     |              |             |
|-----|------|-----|--------------|-------------|
| 380 | 1543 | AAC | 1.119383508  | 0.497079141 |
| 202 | 613  | CTA | 0.767300201  | 0.508572081 |
| 85  | 253  | CAG | 1.136360429  | 0.513102956 |
| 234 | 1087 | ACC | 0.731484866  | 0.53311207  |
| 395 | 1711 | CTC | 0.5          | 0.592592593 |
| 325 | 1372 | AGA | 0.409812748  | 0.595005922 |
| 329 | 1384 | GTC | 0.574597924  | 0.596261587 |
| 11  | 31   | ACC | 0.481807262  | 0.59872978  |
| 124 | 370  | CGG | 0.343349201  | 0.607155736 |
| 7   | 19   | AAA | 0.533466235  | 0.608646227 |
| 200 | 607  | CAC | 0.86034016   | 0.609237817 |
| 349 | 1450 | ATC | 0.511829704  | 0.609314658 |
| 72  | 214  | GAC | 0.865478335  | 0.613557621 |
| 131 | 391  | GAC | 0.849979144  | 0.619191738 |
| 447 | 2005 | AGG | 0.415925537  | 0.621286406 |
| 174 | 520  | GAA | 0.270486826  | 0.639537402 |
| 317 | 1348 | ATG | 0.831448535  | 0.66037956  |
| 427 | 1807 | AAG | 0.333009273  | 0.663603945 |
| 511 | 2575 | GTG | 0.5          | 0.666666667 |
| 106 | 316  | CCC | 0.5          | 0.666666667 |
| 262 | 1171 | GCC | 0.5          | 0.666666667 |
| 266 | 1195 | GCC | 0.5          | 0.666666667 |
| 304 | 1309 | GCC | 0.5          | 0.666666667 |
| 321 | 1360 | ACC | 0.5          | 0.666666667 |
| 15  | 43   | CTC | 0.499065539  | 0.667914948 |
| 79  | 235  | GTC | 0.497093818  | 0.67056423  |
| 505 | 2557 | GTC | 0.497093818  | 0.67056423  |
| 496 | 2371 | TCC | 0.5          | 0.671341198 |
| 145 | 433  | GTG | 0.051765217  | 0.671375068 |
| 269 | 1204 | TTC | 0.294493693  | 0.671936728 |
| 9   | 25   | CGC | 0.497098136  | 0.672624192 |
| 485 | 2137 | ACA | 0.490110064  | 0.68011934  |
| 209 | 634  | TCC | -0.196902413 | 0.684841877 |
| 360 | 1483 | CTG | 0.001189804  | 0.68716571  |
| 4   | 10   | TGG | 0.189827491  | 0.695795039 |
| 492 | 2359 | GTG | 0.474225442  | 0.70290057  |
| 339 | 1420 | CAG | 0.579127527  | 0.708149131 |
| 255 | 1150 | CAG | 0.574268244  | 0.714141273 |
| 192 | 583  | AGC | -0.235916986 | 0.717587898 |
| 477 | 2107 | CTG | 0.079018473  | 0.719638195 |
| 396 | 1714 | AGT | 0.05453552   | 0.725009092 |
| 290 | 1267 | ATC | 0.457820443  | 0.728087482 |
| 14  | 40   | TTG | 0.055173855  | 0.728973539 |
| 251 | 1138 | GAG | 0.038750326  | 0.729571717 |
| 261 | 1168 | AAG | 0.018121811  | 0.734011861 |
| 207 | 628  | ATC | 0.453827103  | 0.734494108 |
| 13  | 37   | GCC | 0            | 0.740740741 |
| 19  | 55   | GCG | 0            | 0.740740741 |
| 196 | 595  | GCC | 0            | 0.740740741 |
| 249 | 1132 | CAG | 0.489115423  | 0.743538336 |
| 141 | 421  | GCC | -0.019243806 | 0.746387601 |
| 149 | 445  | GGT | -0.036632585 | 0.7513951   |
| 61  | 181  | GAG | 0.464287353  | 0.75334561  |



|     |      |     |              |             |
|-----|------|-----|--------------|-------------|
| 256 | 1153 | CTG | -0.249757607 | 0.753719495 |
| 394 | 1708 | CTC | -0.051826675 | 0.755696392 |
| 369 | 1510 | AAG | 0.447520906  | 0.75806164  |
| 252 | 1141 | GAA | -0.417476805 | 0.758332077 |
| 216 | 655  | GGC | -0.348833164 | 0.760446267 |
| 319 | 1354 | TGC | 0.498521147  | 0.760961791 |
| 371 | 1516 | GTG | -0.077175359 | 0.762717873 |
| 190 | 577  | GAC | -0.190625867 | 0.779581513 |
| 351 | 1456 | AGC | -0.15378124  | 0.782765074 |
| 111 | 331  | CAG | -0.20053611  | 0.784670906 |
| 151 | 451  | GCC | -0.47596974  | 0.785755916 |
| 257 | 1156 | GAC | 0.423886289  | 0.788085608 |
| 25  | 73   | GAC | 0.42196168   | 0.789961148 |
| 305 | 1312 | AGC | 0.42196168   | 0.789961148 |
| 21  | 61   | ACT | -0.5         | 0.790123457 |
| 486 | 2335 | GGA | -0.553694411 | 0.798019484 |
| 323 | 1366 | CTT | -0.365749497 | 0.829430789 |
| 132 | 394  | CGG | -0.956675335 | 0.833529771 |
| 157 | 469  | AGC | -1.339135037 | 0.833701942 |
| 426 | 1804 | GAA | -0.991546442 | 0.838508284 |
| 197 | 598  | TTC | -0.901123073 | 0.851264852 |
| 130 | 388  | TCA | -0.81923379  | 0.852346522 |
| 117 | 349  | CAC | -0.550229976 | 0.854658031 |
| 422 | 1792 | ATC | -1.300190927 | 0.861328495 |
| 191 | 580  | AGT | -1.257344237 | 0.869408504 |
| 259 | 1162 | CAC | -0.668661983 | 0.877149236 |
| 115 | 343  | CGC | -0.931907771 | 0.877732049 |
| 6   | 16   | TGG | -1.390895034 | 0.880797618 |
| 41  | 121  | TCC | -0.5         | 0.888888889 |
| 472 | 2089 | GCC | -0.5         | 0.888888889 |
| 291 | 1270 | CCC | -0.5         | 0.888888889 |
| 23  | 67   | GTG | -1           | 0.888888889 |
| 105 | 313  | CCC | -1           | 0.888888889 |
| 448 | 2008 | ACC | -1           | 0.888888889 |
| 397 | 1717 | GGC | -0.501029682 | 0.889071763 |
| 408 | 1750 | TCC | -0.504281638 | 0.889597978 |
| 260 | 1165 | ACG | -0.50469338  | 0.889719518 |
| 499 | 2380 | CTC | -0.505728722 | 0.889901745 |
| 322 | 1363 | CAG | -0.627582223 | 0.890666133 |
| 20  | 58   | GGG | -0.516088827 | 0.891141925 |
| 493 | 2362 | AGG | -1.021851872 | 0.891435626 |
| 67  | 199  | ACC | -0.516077387 | 0.89170337  |
| 53  | 157  | CAG | -1.532007158 | 0.895148827 |
| 204 | 619  | GGC | -0.538925855 | 0.895556029 |
| 64  | 190  | TTG | -0.835430789 | 0.895655424 |
| 494 | 2365 | GCT | -1.061994371 | 0.895977511 |
| 142 | 424  | TCC | -1.080818205 | 0.896220714 |
| 98  | 292  | GGC | -0.550197054 | 0.89720447  |
| 50  | 148  | GCT | -1.5         | 0.899862826 |
| 171 | 511  | CCC | -1.5         | 0.899862826 |
| 189 | 574  | GGG | -1.532941066 | 0.902021571 |
| 88  | 262  | AGG | -0.588730563 | 0.902552533 |
| 144 | 430  | CCG | -1.19694109  | 0.902642053 |

|     |      |     |              |             |
|-----|------|-----|--------------|-------------|
| 17  | 49   | GCC | -1.541912746 | 0.903103408 |
| 93  | 277  | GTG | -1.147170886 | 0.904913657 |
| 33  | 97   | CAG | -0.745752016 | 0.905454195 |
| 60  | 178  | CAG | -1.956899129 | 0.910966788 |
| 454 | 2032 | CAG | -0.821204454 | 0.912085563 |
| 125 | 373  | CAG | -0.826397915 | 0.91345864  |
| 463 | 2059 | ATC | -0.782711365 | 0.927592728 |
| 437 | 1837 | GTC | -0.789829297 | 0.928320584 |
| 308 | 1321 | ATC | -0.797029356 | 0.929046906 |
| 28  | 82   | GAA | -2.039883728 | 0.929113261 |
| 8   | 22   | TTG | -1.255731199 | 0.929779002 |
| 294 | 1279 | AGG | -0.83514948  | 0.931683857 |
| 353 | 1462 | ATC | -0.838507379 | 0.933044124 |
| 378 | 1537 | AGG | -1.544548537 | 0.933284264 |
| 438 | 1840 | TTT | -0.864395708 | 0.93473023  |
| 383 | 1552 | AAG | -0.916160552 | 0.938445804 |
| 113 | 337  | GAG | -0.979105169 | 0.942044785 |
| 222 | 673  | AAA | -0.969549848 | 0.9424574   |
| 187 | 559  | CTT | -1.90301208  | 0.946435246 |
| 69  | 205  | AAA | -1.848799971 | 0.949173842 |
| 413 | 1765 | GAT | -1.780018692 | 0.949324969 |
| 338 | 1417 | ATC | -1.295343356 | 0.950945246 |
| 488 | 2347 | AAG | -1.911649146 | 0.951828863 |
| 96  | 286  | GAC | -1.925594799 | 0.952697336 |
| 80  | 238  | AAC | -1.14476937  | 0.954812734 |
| 74  | 220  | AGC | -1.144799345 | 0.954814344 |
| 449 | 2011 | ACC | -2.503045144 | 0.954855448 |
| 331 | 1396 | GAC | -1.147063627 | 0.954935741 |
| 42  | 124  | TAC | -2.141072161 | 0.955419284 |
| 238 | 1099 | CTC | -1.369555451 | 0.955779929 |
| 231 | 1078 | GAT | -2.135449858 | 0.962900526 |
| 127 | 379  | GTC | -1.5         | 0.962962963 |
| 166 | 496  | GCC | -1.5         | 0.962962963 |
| 402 | 1732 | GTT | -1.5         | 0.962962963 |
| 159 | 475  | ACC | -2.217826435 | 0.963784597 |
| 491 | 2356 | AGC | -3.166987479 | 0.963823962 |
| 359 | 1480 | GTC | -1.526528134 | 0.964245122 |
| 5   | 13   | GGC | -1.570349437 | 0.966246014 |
| 385 | 1558 | AGG | -1.638717883 | 0.968972161 |
| 336 | 1411 | AGA | -3.0952209   | 0.970959092 |
| 476 | 2104 | ATG | -5.481352291 | 0.972202063 |
| 102 | 304  | CAA | -2.192968623 | 0.972538707 |
| 24  | 70   | GGC | -1.927907782 | 0.976974819 |
| 99  | 295  | TCA | -2.323443364 | 0.978416379 |
| 497 | 2374 | ATT | -2.052798867 | 0.981192973 |
| 501 | 2386 | ATC | -3.530866032 | 0.981294701 |
| 374 | 1525 | AAA | -2.257123418 | 0.984326533 |
| 487 | 2338 | AAT | -3.135496417 | 0.984703381 |
| 246 | 1123 | TAC | -2.589036603 | 0.985660418 |
| 464 | 2065 | CCC | -2.387691882 | 0.985798049 |
| 217 | 658  | CCC | -2.5         | 0.987654321 |
| 169 | 505  | AAC | -3.485314837 | 0.988993767 |
| 301 | 1300 | ACG | -2.61554071  | 0.989270116 |

|     |      |     |              |             |
|-----|------|-----|--------------|-------------|
| 335 | 1408 | AGC | -2.615985148 | 0.989483068 |
| 316 | 1345 | AGA | -2.774390332 | 0.990674068 |
| 327 | 1378 | CAC | -4.201758278 | 0.994290388 |
| 92  | 274  | CAA | -5.023345529 | 0.997691932 |
| 362 | 1489 | ACT | -5.2371476   | 0.99795646  |
| 428 | 1810 | AGG | -4.666255436 | 0.998676975 |
| 412 | 1762 | ATC | -5.524644679 | 0.999534393 |
| 284 | 1249 | AGC | -6.280125546 | 0.999767947 |
| 376 | 1531 | TTA | -3.228271408 | 1           |
| 387 | 1564 | ATC | -3.755670631 | 1           |
| 469 | 2080 | TTT | -2.97564776  | 1           |
| 46  | 136  | TGC | -4.105175216 | 1           |
| 274 | 1219 | CAC | -4.184902031 | 1           |
| 474 | 2098 | GAC | -4.29981346  | 1           |
| 226 | 1063 | ATC | -4.841066263 | 1           |
| 201 | 610  | TGC | -5.366414017 | 1           |
| 243 | 1114 | GAG | -5.627099809 | 1           |
| 507 | 2563 | CTG | -0.616491883 | 1           |
| 293 | 1276 | CTG | -0.61688089  | 1           |
| 242 | 1111 | CTG | -0.627143599 | 1           |
| 299 | 1294 | CTG | -0.64035991  | 1           |
| 450 | 2014 | CTG | -0.858110461 | 1           |
| 16  | 46   | CTC | -0.935896037 | 1           |
| 268 | 1201 | CTC | -0.935896037 | 1           |
| 289 | 1264 | CTC | -0.935896037 | 1           |
| 399 | 1723 | CTC | -0.978747302 | 1           |
| 81  | 241  | CGC | -0.982574505 | 1           |
| 22  | 64   | GCA | -1           | 1           |
| 37  | 109  | GGG | -1           | 1           |
| 66  | 196  | GTC | -1           | 1           |
| 363 | 1492 | GTC | -1           | 1           |
| 368 | 1507 | ACC | -1           | 1           |
| 398 | 1720 | CGC | -1           | 1           |
| 442 | 1990 | GTG | -1           | 1           |
| 500 | 2383 | CCC | -1           | 1           |
| 65  | 193  | TCT | -1           | 1           |
| 137 | 409  | GGC | -1           | 1           |
| 193 | 586  | CCC | -1           | 1           |
| 332 | 1399 | ACC | -1           | 1           |
| 366 | 1501 | GCG | -1           | 1           |
| 382 | 1549 | TCC | -1           | 1           |
| 386 | 1561 | GCC | -1           | 1           |
| 404 | 1738 | TCC | -1           | 1           |
| 417 | 1777 | GGC | -1           | 1           |
| 441 | 1987 | GGA | -1           | 1           |
| 373 | 1522 | AGG | -1.067321451 | 1           |
| 281 | 1240 | CTG | -1.228808355 | 1           |
| 122 | 364  | ATC | -1.256505389 | 1           |
| 318 | 1351 | ATC | -1.256967857 | 1           |
| 334 | 1405 | ATC | -1.256967857 | 1           |
| 409 | 1753 | ATC | -1.259465686 | 1           |
| 164 | 490  | CTG | -1.28071982  | 1           |
| 213 | 646  | TGT | -1.308503021 | 1           |

|     |      |     |              |   |
|-----|------|-----|--------------|---|
| 90  | 268  | GAT | -1.31147567  | 1 |
| 393 | 1582 | CAT | -1.31147567  | 1 |
| 54  | 160  | GAT | -1.321128009 | 1 |
| 178 | 532  | GAT | -1.321128009 | 1 |
| 250 | 1135 | TGT | -1.333475292 | 1 |
| 509 | 2569 | GAT | -1.333475292 | 1 |
| 423 | 1795 | TTG | -1.353386437 | 1 |
| 435 | 1831 | TTG | -1.357489297 | 1 |
| 38  | 112  | AAA | -1.400377501 | 1 |
| 405 | 1741 | AAA | -1.400377501 | 1 |
| 315 | 1342 | CAG | -1.411559767 | 1 |
| 101 | 301  | GAG | -1.415993367 | 1 |
| 420 | 1786 | AAG | -1.415993367 | 1 |
| 468 | 2077 | AAG | -1.415993367 | 1 |
| 247 | 1126 | AAG | -1.416404896 | 1 |
| 508 | 2566 | GAG | -1.416404896 | 1 |
| 225 | 682  | GAG | -1.416981895 | 1 |
| 285 | 1252 | GAG | -1.416981895 | 1 |
| 462 | 2056 | CAG | -1.417102697 | 1 |
| 179 | 535  | GAG | -1.417398971 | 1 |
| 278 | 1231 | AAG | -1.418028105 | 1 |
| 114 | 340  | TTT | -1.502880723 | 1 |
| 506 | 2560 | AGT | -1.502880723 | 1 |
| 455 | 2035 | TAT | -1.534950878 | 1 |
| 68  | 202  | TGC | -1.551042488 | 1 |
| 248 | 1129 | TGC | -1.551042488 | 1 |
| 267 | 1198 | TAC | -1.551042488 | 1 |
| 288 | 1261 | AGC | -1.551042488 | 1 |
| 357 | 1474 | GAC | -1.551042488 | 1 |
| 400 | 1726 | TAC | -1.551042488 | 1 |
| 418 | 1780 | AAC | -1.551042488 | 1 |
| 116 | 346  | TGC | -1.558108178 | 1 |
| 160 | 478  | TGC | -1.568089016 | 1 |
| 233 | 1084 | GAC | -1.568089016 | 1 |
| 236 | 1093 | AGC | -1.568089016 | 1 |
| 443 | 1993 | AAC | -1.568089016 | 1 |
| 109 | 325  | TGC | -1.568116955 | 1 |
| 199 | 604  | TTC | -1.568116955 | 1 |
| 218 | 661  | GAC | -1.568116955 | 1 |
| 168 | 502  | GAC | -1.570227681 | 1 |
| 254 | 1147 | TTC | -1.570227681 | 1 |
| 342 | 1429 | GAC | -1.570227681 | 1 |
| 377 | 1534 | TTC | -1.570227681 | 1 |
| 411 | 1759 | AGC | -1.570227681 | 1 |
| 30  | 88   | AAC | -1.575426958 | 1 |
| 172 | 514  | GAC | -1.575426958 | 1 |
| 309 | 1324 | TAC | -1.584535202 | 1 |
| 406 | 1744 | CTT | -1.896114084 | 1 |
| 48  | 142  | GGC | -2           | 1 |
| 76  | 226  | GGG | -2           | 1 |
| 78  | 232  | CGT | -2           | 1 |
| 84  | 250  | CCT | -2           | 1 |
| 147 | 439  | ACC | -2           | 1 |

|     |      |     |              |   |
|-----|------|-----|--------------|---|
| 158 | 472  | TCC | -2           | 1 |
| 162 | 484  | CCC | -2           | 1 |
| 186 | 556  | GGT | -2           | 1 |
| 258 | 1159 | CCC | -2           | 1 |
| 287 | 1258 | ACC | -2           | 1 |
| 296 | 1285 | GTG | -2           | 1 |
| 298 | 1291 | GCT | -2           | 1 |
| 330 | 1387 | TCT | -2           | 1 |
| 346 | 1441 | GTG | -2           | 1 |
| 365 | 1498 | GTT | -2           | 1 |
| 375 | 1528 | ACG | -2           | 1 |
| 381 | 1546 | GGC | -2           | 1 |
| 388 | 1567 | GTG | -2           | 1 |
| 392 | 1579 | GTT | -2           | 1 |
| 410 | 1756 | TCA | -2           | 1 |
| 452 | 2023 | GGC | -2           | 1 |
| 466 | 2071 | TCG | -2           | 1 |
| 481 | 2125 | AGG | -2.080926841 | 1 |
| 307 | 1318 | AGA | -2.099118295 | 1 |
| 83  | 247  | ATT | -2.468207438 | 1 |
| 104 | 310  | TGT | -2.638982544 | 1 |
| 135 | 403  | TTG | -2.648097424 | 1 |
| 95  | 283  | TGC | -2.678568239 | 1 |
| 128 | 382  | TGT | -2.683652834 | 1 |
| 239 | 1102 | TGC | -2.734206045 | 1 |
| 457 | 2041 | TGC | -2.745178534 | 1 |
| 458 | 2044 | CTC | -2.759903913 | 1 |
| 139 | 415  | GAC | -2.78717825  | 1 |
| 283 | 1246 | CGG | -2.788170132 | 1 |
| 273 | 1216 | CGG | -2.814822551 | 1 |
| 228 | 1069 | GAG | -2.832067329 | 1 |
| 58  | 172  | GAG | -2.832655784 | 1 |
| 120 | 358  | AAG | -2.832685788 | 1 |
| 198 | 601  | GAG | -2.833391405 | 1 |
| 89  | 265  | TGC | -2.857198345 | 1 |
| 148 | 442  | TGT | -2.872126704 | 1 |
| 97  | 289  | AAC | -2.882461203 | 1 |
| 227 | 1066 | GAT | -2.939567203 | 1 |
| 214 | 649  | GAT | -2.94073694  | 1 |
| 47  | 139  | GAT | -2.941176867 | 1 |
| 18  | 52   | GCG | -3           | 1 |
| 91  | 271  | GGC | -3           | 1 |
| 150 | 448  | CCC | -3           | 1 |
| 297 | 1288 | GTC | -3           | 1 |
| 341 | 1426 | CCC | -3           | 1 |
| 384 | 1555 | CCA | -3           | 1 |
| 45  | 133  | GTC | -3           | 1 |
| 108 | 322  | ACG | -3           | 1 |
| 119 | 355  | GGG | -3           | 1 |
| 223 | 676  | TCT | -3           | 1 |
| 311 | 1330 | TCT | -3           | 1 |
| 356 | 1471 | ACC | -3           | 1 |
| 358 | 1477 | TCT | -3           | 1 |

|     |      |     |              |   |
|-----|------|-----|--------------|---|
| 391 | 1576 | CCT | -3           | 1 |
| 430 | 1816 | GCC | -3           | 1 |
| 489 | 2350 | CCC | -3           | 1 |
| 306 | 1315 | AAT | -3.002562287 | 1 |
| 203 | 616  | AGT | -3.011921488 | 1 |
| 129 | 385  | GAC | -3.065986255 | 1 |
| 206 | 625  | TGC | -3.065986255 | 1 |
| 126 | 376  | TTC | -3.070020593 | 1 |
| 224 | 679  | GAC | -3.070020593 | 1 |
| 170 | 508  | GAC | -3.095551005 | 1 |
| 134 | 400  | TGC | -3.099286194 | 1 |
| 156 | 466  | AAC | -3.103463418 | 1 |
| 272 | 1213 | AAC | -3.103463418 | 1 |
| 350 | 1453 | CAC | -3.103463418 | 1 |
| 324 | 1369 | GAC | -3.117778794 | 1 |
| 155 | 463  | TGC | -3.135613763 | 1 |
| 29  | 85   | AGA | -3.17983137  | 1 |
| 62  | 184  | ACG | -4           | 1 |
| 370 | 1513 | GGC | -4           | 1 |
| 56  | 166  | TCT | -4           | 1 |
| 181 | 541  | CCG | -4           | 1 |
| 244 | 1117 | GGT | -4           | 1 |
| 276 | 1225 | GTC | -4           | 1 |
| 345 | 1438 | GCT | -4           | 1 |
| 364 | 1495 | TCT | -4           | 1 |
| 416 | 1774 | GGG | -4           | 1 |
| 473 | 2095 | CCG | -4           | 1 |
| 512 | 2578 | GCG | -4           | 1 |
| 75  | 223  | TGT | -4.011096061 | 1 |
| 118 | 352  | GAT | -4.027221121 | 1 |
| 27  | 79   | TGC | -4.043610332 | 1 |
| 367 | 1504 | GAT | -4.105979324 | 1 |
| 184 | 550  | TGT | -4.106043176 | 1 |
| 390 | 1573 | GAT | -4.106043176 | 1 |
| 167 | 499  | TGC | -4.129755135 | 1 |
| 112 | 334  | GAC | -4.144382406 | 1 |
| 510 | 2572 | GAC | -4.178953734 | 1 |
| 471 | 2086 | TGC | -4.184902031 | 1 |
| 34  | 100  | TGC | -4.2012941   | 1 |
| 208 | 631  | CAC | -4.545998768 | 1 |
| 136 | 406  | GAC | -4.551911561 | 1 |
| 133 | 397  | GAC | -4.572519446 | 1 |
| 425 | 1801 | GAT | -4.58314455  | 1 |
| 403 | 1735 | GAC | -4.5893252   | 1 |
| 173 | 517  | TGC | -4.594057155 | 1 |
| 295 | 1282 | AAC | -4.617897604 | 1 |
| 36  | 106  | GAC | -4.645385468 | 1 |
| 100 | 298  | GAC | -4.666878067 | 1 |
| 277 | 1228 | AGG | -4.734554576 | 1 |
| 232 | 1081 | CCC | -5           | 1 |
| 421 | 1789 | ACC | -5           | 1 |
| 70  | 208  | TCC | -5           | 1 |
| 177 | 529  | TCG | -5           | 1 |

|     |      |     |              |   |
|-----|------|-----|--------------|---|
| 195 | 592  | TCG | -5           | 1 |
| 280 | 1237 | ACG | -5           | 1 |
| 461 | 2053 | CCG | -5           | 1 |
| 175 | 523  | GAT | -5.406193745 | 1 |
| 415 | 1771 | AAC | -5.445799211 | 1 |
| 431 | 1819 | CAC | -5.674315628 | 1 |
| 138 | 412  | TCA | -6           | 1 |
| 215 | 652  | GGT | -6           | 1 |
| 459 | 2047 | CCT | -6           | 1 |
| 265 | 1192 | ATC | -6.731512457 | 1 |

**Supplementary Table S2. B.** Detection of positions in the LDLR sequence alignment that are likely to experience episodic positive selection (the MEME program).

**Position    *p*-Value**

|     |       |
|-----|-------|
| 252 | <0.01 |
| 769 | <0.01 |
| 26  | 0.05  |
| 397 | 0.04  |
| 678 | 0.04  |
| 754 | 0.04  |
| 764 | 0.04  |
| 107 | 0.03  |
| 727 | 0.03  |
| 746 | 0.01  |

**Supplementary Table S3. A.** Selection for each codon estimated using the HyPhy model, ACE2 alignment. dN is the ratio of non-synonymous mutations, dS is the ratio of synonymous mutations. Positive dN-dS indicate an excess of dN over dS (suggesting positive selection). Small P values indicate support of positive selection

| <b>Codon#</b> | <b>Codon Start</b> | <b>Triplet</b> | <b>dN-dS</b> | <b><i>p</i>-Value</b> |
|---------------|--------------------|----------------|--------------|-----------------------|
| 757           | 2356               | ATT            | 4.15433764   | 0.054315214           |
| 91            | 277                | GTC            | 3.406238154  | 0.070780305           |
| 628           | 1969               | AAA            | 4.05117411   | 0.093565959           |
| 601           | 1888               | GAT            | 3.588988964  | 0.095854024           |
| 646           | 2023               | TTG            | 2.969974358  | 0.106243179           |
| 660           | 2065               | AAA            | 3.698822463  | 0.123053682           |
| 274           | 856                | GGA            | 2.517423449  | 0.15458334            |
| 465           | 1471               | GTG            | 2.113408065  | 0.159944441           |
| 602           | 1891               | AAA            | 3.180990445  | 0.163912618           |
| 627           | 1966               | TTA            | 2.039198042  | 0.164287258           |
| 65            | 199                | GAC            | 2.357206635  | 0.182108744           |
| 216           | 682                | CAT            | 2.746756762  | 0.1867426             |
| 764           | 2377               | CCA            | 2.037979435  | 0.189899843           |
| 154           | 466                | TTA            | 2.065937871  | 0.190460819           |
| 747           | 2326               | AGT            | 2.30749999   | 0.199782388           |
| 730           | 2275               | ATC            | 2.327056105  | 0.201175002           |
| 711           | 2218               | TCC            | 1.970569188  | 0.209598512           |
| 39            | 121                | TAT            | 2.42067825   | 0.214069182           |
| 738           | 2299               | GAT            | 2.238692957  | 0.231821888           |

|     |      |     |             |             |
|-----|------|-----|-------------|-------------|
| 696 | 2173 | CTG | 1.380747099 | 0.23312519  |
| 148 | 448  | GAA | 2.272009313 | 0.234303954 |
| 62  | 190  | AAT | 2.239857845 | 0.234515195 |
| 744 | 2317 | AAA | 2.641671645 | 0.234864665 |
| 219 | 691  | GAA | 1.901941501 | 0.25869672  |
| 767 | 2386 | CAA | 2.300928885 | 0.26087691  |
| 629 | 1972 | GTA | 2.347277499 | 0.261566693 |
| 687 | 2146 | CGT | 2.175426498 | 0.274796816 |
| 507 | 1606 | GAA | 2.240066529 | 0.283617474 |
| 57  | 175  | GTC | 2.132350333 | 0.283778488 |
| 539 | 1702 | CTA | 1.691507174 | 0.28786219  |
| 314 | 976  | GGA | 1.56771926  | 0.29353042  |
| 726 | 2263 | GTT | 1.498059514 | 0.297449196 |
| 617 | 1936 | TCT | 1.492003459 | 0.301805115 |
| 12  | 34   | GTT | 1.490051015 | 0.302271073 |
| 394 | 1258 | TCC | 1.491976012 | 0.302727762 |
| 331 | 1027 | GTC | 1.480912332 | 0.307901604 |
| 63  | 193  | GCT | 1.48050854  | 0.30910477  |
| 183 | 553  | GTC | 1.470746622 | 0.314330426 |
| 206 | 652  | AGC | 2.108826966 | 0.322110663 |
| 243 | 763  | TAT | 2.010665893 | 0.323479977 |
| 361 | 1159 | GCA | 1.709133157 | 0.342514141 |
| 758 | 2359 | AGC | 1.969385674 | 0.347390753 |
| 286 | 892  | GTG | 1.424441676 | 0.349090964 |
| 113 | 343  | CGG | 1.413690466 | 0.350084324 |
| 3   | 7    | AGC | 1.412431653 | 0.354893198 |
| 634 | 1987 | ATT | 1.411640652 | 0.355490116 |
| 680 | 2125 | AGC | 1.723465742 | 0.35821546  |
| 77  | 235  | CTT | 1.592184063 | 0.366628759 |
| 89  | 271  | CTC | 1.507069152 | 0.375634232 |
| 200 | 634  | GTA | 1.404949485 | 0.385877571 |
| 220 | 694  | GAG | 1.574754018 | 0.405939509 |
| 684 | 2137 | GAT | 1.340857769 | 0.414812526 |
| 41  | 127  | AGT | 1.340666916 | 0.414989705 |
| 325 | 1009 | GGA | 1.324543738 | 0.415071029 |
| 84  | 256  | CAA | 1.579076234 | 0.420452258 |
| 624 | 1957 | CAG | 1.707266758 | 0.423080714 |
| 61  | 187  | AAT | 1.330884355 | 0.424208182 |
| 551 | 1738 | AAT | 1.330884355 | 0.424208182 |
| 543 | 1714 | AAT | 1.335973122 | 0.424325909 |
| 723 | 2254 | GTG | 0.965325262 | 0.428866352 |
| 82  | 250  | CCA | 1.028093145 | 0.436236029 |
| 760 | 2365 | GGA | 1.050701389 | 0.436990228 |
| 722 | 2251 | GGA | 1.101862803 | 0.43911134  |
| 168 | 508  | TCT | 1           | 0.444444444 |
| 716 | 2233 | GTT | 0.995967964 | 0.44805027  |
| 158 | 478  | GAG | 1.344315163 | 0.45017226  |
| 547 | 1726 | GCA | 0.993765349 | 0.451908777 |
| 759 | 2362 | AAA | 1.365371465 | 0.453682983 |
| 341 | 1057 | AAG | 1.358688514 | 0.456363298 |
| 105 | 319  | GTG | 1           | 0.46090535  |
| 635 | 1990 | CTT | 1           | 0.46090535  |
| 239 | 751  | GCC | 1           | 0.46090535  |



|     |      |     |             |             |
|-----|------|-----|-------------|-------------|
| 745 | 2320 | GCA | 0.98611438  | 0.461328583 |
| 289 | 901  | GCC | 0.967595967 | 0.471570898 |
| 120 | 364  | ACA | 0.975013681 | 0.471765641 |
| 96  | 292  | CAG | 1.269773131 | 0.471994286 |
| 710 | 2215 | GTT | 0.958695594 | 0.474498444 |
| 733 | 2284 | TTC | 1.281237931 | 0.475456335 |
| 772 | 2401 | GTT | 0.94860267  | 0.47781653  |
| 503 | 1594 | GCA | 0.926329543 | 0.48595246  |
| 669 | 2092 | ACT | 0.912584048 | 0.489636431 |
| 676 | 2113 | AGG | 0.947652437 | 0.49490212  |
| 28  | 88   | GAC | 1.275447373 | 0.496403548 |
| 403 | 1285 | CAA | 1.19484481  | 0.497869613 |
| 5   | 13   | TCC | 0.941690358 | 0.501188659 |
| 755 | 2350 | ATC | 0.867313458 | 0.508161641 |
| 746 | 2323 | AGA | 0.860010309 | 0.522238042 |
| 293 | 913  | CAG | 0.976002428 | 0.527619683 |
| 707 | 2206 | CAG | 1.120212789 | 0.529651981 |
| 141 | 427  | TTA | 0.634549632 | 0.529682725 |
| 58  | 178  | CAA | 1.118464402 | 0.533219122 |
| 553 | 1744 | AGG | 0.799968581 | 0.535020798 |
| 313 | 973  | CAA | 1.117073764 | 0.54291354  |
| 587 | 1846 | CAA | 1.114028908 | 0.545188478 |
| 134 | 406  | GAT | 0.850759441 | 0.545542986 |
| 563 | 1774 | TTT | 0.899313335 | 0.549535073 |
| 548 | 1729 | AAG | 0.922984624 | 0.556462086 |
| 101 | 307  | AAT | 0.892138545 | 0.560912276 |
| 615 | 1930 | CGA | 0.45803496  | 0.562814447 |
| 401 | 1279 | GAT | 0.888612073 | 0.562850509 |
| 638 | 1999 | GAG | 0.919013801 | 0.563282139 |
| 689 | 2152 | AAT | 0.887256237 | 0.564572032 |
| 743 | 2314 | AAT | 0.887256237 | 0.564572032 |
| 283 | 883  | GAT | 0.888119363 | 0.565816748 |
| 317 | 985  | GAA | 0.801975003 | 0.567330351 |
| 457 | 1447 | GAG | 0.903692927 | 0.588823723 |
| 699 | 2182 | CAG | 0.732471934 | 0.588870921 |
| 685 | 2140 | GCT | 0.5         | 0.592592593 |
| 196 | 622  | GAA | 0.893543498 | 0.599194111 |
| 247 | 775  | ATT | 0.480404279 | 0.59920109  |
| 663 | 2074 | TCT | 0.480198609 | 0.599504902 |
| 170 | 514  | GTC | 0.47630769  | 0.600575617 |
| 112 | 340  | AAA | 0.90794061  | 0.602057414 |
| 85  | 259  | GAA | 0.893816469 | 0.602663037 |
| 692 | 2161 | AGC | 0.858031162 | 0.603686355 |
| 748 | 2329 | GGA | 0.891881775 | 0.606607661 |
| 703 | 2194 | GGA | 0.141801213 | 0.611207239 |
| 753 | 2344 | GCC | 0.444195702 | 0.611398464 |
| 328 | 1018 | CAG | 0.568856079 | 0.614218748 |
| 568 | 1789 | GAC | 0.578342163 | 0.618100767 |
| 107 | 325  | TCA | 0.616564067 | 0.61859596  |
| 104 | 316  | TCA | 0.613734874 | 0.619680479 |
| 132 | 400  | AAC | 0.838821268 | 0.636114832 |
| 152 | 460  | AAC | 0.243769848 | 0.640693138 |
| 76  | 232  | ACA | 0.408838787 | 0.646872815 |

|     |      |     |              |             |
|-----|------|-----|--------------|-------------|
| 580 | 1825 | GAC | 0.445585908  | 0.649089008 |
| 38  | 118  | TTC | 0.314773154  | 0.653088052 |
| 527 | 1666 | AAT | 0.373382591  | 0.654160603 |
| 204 | 646  | GAC | 0.159715256  | 0.654985403 |
| 653 | 2044 | AAT | 0.354702095  | 0.657549146 |
| 765 | 2380 | GGA | 0.527107271  | 0.658849418 |
| 128 | 388  | GGA | 0.52521209   | 0.661226817 |
| 29  | 91   | AAG | 0.348752901  | 0.661500779 |
| 470 | 1486 | ACA | 0.506782351  | 0.663665857 |
| 25  | 79   | ACA | 0.5          | 0.666666667 |
| 45  | 139  | TCT | 0.5          | 0.666666667 |
| 386 | 1234 | GCA | 0.5          | 0.666666667 |
| 476 | 1504 | TCT | 0.5          | 0.666666667 |
| 481 | 1519 | TCT | 0.5          | 0.666666667 |
| 598 | 1879 | GCT | 0.5          | 0.666666667 |
| 15  | 43   | ACT | 0.499833896  | 0.666888213 |
| 127 | 385  | ACT | 0.499829548  | 0.666894014 |
| 202 | 640  | GGC | 0.249282226  | 0.666960448 |
| 69  | 211  | GCC | 0.499413461  | 0.667449638 |
| 673 | 2104 | AAG | 0.31791651   | 0.669125418 |
| 217 | 685  | ACC | 0.498021003  | 0.669315815 |
| 531 | 1678 | CTT | 0.495756979  | 0.672372447 |
| 642 | 2011 | CGA | 0.035020404  | 0.674360531 |
| 208 | 658  | GGC | 0.035554691  | 0.676298159 |
| 83  | 253  | CTA | 0.018751343  | 0.682207993 |
| 491 | 1558 | CTT | 0.47870449   | 0.696323808 |
| 42  | 130  | TCA | 0.153566829  | 0.696469707 |
| 578 | 1819 | AGT | 0.184201321  | 0.698185322 |
| 111 | 337  | AGC | 0.1699051    | 0.701429991 |
| 769 | 2392 | ACT | -0.119368435 | 0.701838281 |
| 108 | 328  | GAA | 0.479220158  | 0.705677112 |
| 211 | 667  | ATT | 0.468997152  | 0.71073637  |
| 588 | 1849 | AGC | 0.06780063   | 0.7235989   |
| 275 | 859  | CAG | 0.56660479   | 0.723916668 |
| 662 | 2071 | GTG | 0.045915677  | 0.726826259 |
| 502 | 1591 | CAA | 0.57146057   | 0.729917107 |
| 133 | 403  | CCA | 0.023570824  | 0.733784508 |
| 79  | 241  | CAA | 0.561758632  | 0.736727107 |
| 8   | 22   | CTT | 0.009246466  | 0.737988399 |
| 40  | 124  | CAA | 0.556889752  | 0.738412046 |
| 574 | 1807 | TTT | 0.038782965  | 0.738863693 |
| 23  | 73   | GCC | 0            | 0.740740741 |
| 97  | 295  | GCT | 0            | 0.740740741 |
| 322 | 1000 | ACG | -0.002803152 | 0.74157014  |
| 618 | 1939 | GTT | -0.008072081 | 0.743122804 |
| 116 | 352  | ACA | -0.014152344 | 0.744904297 |
| 234 | 736  | GCA | -0.528435653 | 0.745738717 |
| 310 | 964  | AAT | -0.033133863 | 0.746006805 |
| 64  | 196  | GGG | -0.020101304 | 0.746619794 |
| 763 | 2374 | AAT | 0.446069273  | 0.74726809  |
| 24  | 76   | AAG | -0.042667858 | 0.747748211 |
| 327 | 1015 | GTT | -0.02440145  | 0.747882298 |
| 655 | 2050 | TTT | 0.446221309  | 0.750289699 |

|     |      |     |              |             |
|-----|------|-----|--------------|-------------|
| 165 | 499  | AGC | -0.034995308 | 0.750927469 |
| 273 | 853  | TTT | 0.443916395  | 0.751258714 |
| 47  | 145  | AAT | 0.443628118  | 0.751380085 |
| 291 | 907  | GAT | 0.443628118  | 0.751380085 |
| 123 | 373  | ACC | -0.040708889 | 0.752555862 |
| 564 | 1777 | ACC | -0.042435108 | 0.753045915 |
| 741 | 2308 | AAG | -0.034038321 | 0.758909409 |
| 406 | 1294 | AAT | -0.461732301 | 0.758956221 |
| 169 | 511  | GAG | 0.452391803  | 0.76797742  |
| 390 | 1246 | AAG | 0.454052866  | 0.768032374 |
| 445 | 1411 | GAC | -0.145963641 | 0.769867516 |
| 157 | 475  | AAT | -0.544552969 | 0.771197019 |
| 143 | 433  | GAA | -0.162807183 | 0.772837665 |
| 329 | 1021 | AAA | 0.451494067  | 0.773897566 |
| 533 | 1684 | AAA | 0.448869943  | 0.775796345 |
| 449 | 1423 | AAA | 0.454158098  | 0.775851672 |
| 393 | 1255 | AAA | 0.453868737  | 0.77596249  |
| 129 | 391  | AAA | 0.449823706  | 0.776317512 |
| 33  | 103  | GAA | 0.452308798  | 0.776560451 |
| 742 | 2311 | AAA | 0.449038664  | 0.776608627 |
| 630 | 1975 | AAA | 0.449589755  | 0.777604931 |
| 444 | 1408 | AAA | 0.44926958   | 0.777728107 |
| 530 | 1675 | AGG | -0.598806329 | 0.778407434 |
| 520 | 1645 | GAA | 0.44599663   | 0.778989494 |
| 542 | 1711 | GAA | 0.445941605  | 0.779010735 |
| 658 | 2059 | GCA | -0.450005312 | 0.779153335 |
| 567 | 1786 | AAA | -0.216419233 | 0.782722527 |
| 66  | 202  | AAA | 0.445040516  | 0.783172254 |
| 294 | 916  | AGA | -0.199109897 | 0.792365228 |
| 766 | 2383 | TTC | 0.420502255  | 0.792702844 |
| 197 | 625  | GTA | -0.534958667 | 0.796161906 |
| 677 | 2116 | ATG | 2.078107729  | 0.797905806 |
| 650 | 2035 | ATC | -0.229182955 | 0.800803953 |
| 284 | 886  | GCA | -0.631256149 | 0.811913816 |
| 571 | 1798 | AAG | -0.68091727  | 0.8135399   |
| 632 | 1981 | CAG | -0.367770654 | 0.816046878 |
| 631 | 1978 | AAT | -0.907399585 | 0.816636053 |
| 644 | 2017 | GCT | -0.818308991 | 0.821764987 |
| 700 | 2185 | CCA | -0.994068622 | 0.825690229 |
| 724 | 2257 | ATA | -0.727534839 | 0.827385619 |
| 754 | 2347 | TCC | -1.071548436 | 0.834891147 |
| 201 | 637  | GAT | -0.929377197 | 0.835403508 |
| 368 | 1180 | AAT | -0.957244938 | 0.83864566  |
| 740 | 2305 | AAG | -0.449455405 | 0.842009592 |
| 88  | 268  | AAT | -0.435694731 | 0.842231053 |
| 762 | 2371 | AAT | -0.99508149  | 0.842936388 |
| 227 | 715  | CAT | -0.468417858 | 0.846237618 |
| 439 | 1393 | AAA | -1.015372758 | 0.852850312 |
| 297 | 925  | AAG | -0.550300809 | 0.856197788 |
| 147 | 445  | AAT | -0.52198862  | 0.856301226 |
| 326 | 1012 | AAT | -0.526469639 | 0.857154263 |
| 640 | 2005 | GAT | -0.526469639 | 0.857154263 |
| 706 | 2203 | AAC | -0.599701351 | 0.857608371 |

|     |      |     |              |             |
|-----|------|-----|--------------|-------------|
| 512 | 1621 | AAA | -0.596030275 | 0.86349027  |
| 612 | 1921 | TAC | -0.672842946 | 0.86674366  |
| 59  | 181  | AAC | -0.635978299 | 0.869132806 |
| 529 | 1672 | CTG | -0.643377358 | 0.870268412 |
| 226 | 712  | GAA | -0.665765232 | 0.872678365 |
| 100 | 304  | CAA | -1.352695859 | 0.875065332 |
| 93  | 283  | CTT | -0.913958364 | 0.877627695 |
| 36  | 112  | GAC | -0.711486586 | 0.881511878 |
| 613 | 1924 | CTG | -0.725212354 | 0.881725437 |
| 399 | 1273 | TCA | -0.476169459 | 0.881829715 |
| 193 | 613  | GGA | -0.478322037 | 0.882467092 |
| 557 | 1756 | AAC | -0.737845222 | 0.885576384 |
| 637 | 1996 | GGG | -1.3620232   | 0.886119985 |
| 268 | 838  | TCT | -0.9902612   | 0.886962093 |
| 305 | 949  | TCT | -0.499053019 | 0.888608302 |
| 585 | 1840 | GCA | -1           | 0.888888889 |
| 16  | 46   | GCT | -0.5         | 0.888888889 |
| 78  | 238  | GCC | -0.5         | 0.888888889 |
| 130 | 394  | GTT | -0.5         | 0.888888889 |
| 230 | 724  | GCC | -0.5         | 0.888888889 |
| 270 | 844  | ACA | -0.5         | 0.888888889 |
| 725 | 2260 | GTG | -0.5         | 0.888888889 |
| 727 | 2266 | GGC | -0.5         | 0.888888889 |
| 734 | 2287 | ACT | -0.5         | 0.888888889 |
| 68  | 208  | TCT | -0.502864109 | 0.889396666 |
| 50  | 154  | ACC | -0.50834821  | 0.890361176 |
| 22  | 70   | CAG | -1.988050391 | 0.892713255 |
| 608 | 1909 | GAC | -0.802559508 | 0.892783842 |
| 575 | 1810 | GTG | -0.526423524 | 0.893228005 |
| 199 | 631  | GGG | -0.536735193 | 0.893316251 |
| 526 | 1663 | TTC | -1.070762208 | 0.896939245 |
| 80  | 244  | ATG | -1.751781198 | 0.900783749 |
| 517 | 1636 | AAC | -1.402287348 | 0.902141237 |
| 400 | 1276 | CCC | -1.897893932 | 0.904800203 |
| 728 | 2269 | ATT | -0.642890843 | 0.911082413 |
| 194 | 616  | GAC | -1.538860977 | 0.91231051  |
| 737 | 2296 | AGA | -0.685061304 | 0.912671544 |
| 67  | 205  | TGG | 1.200004926  | 0.913612158 |
| 605 | 1900 | GAA | -2.305082118 | 0.913822419 |
| 151 | 457  | GCA | -1.256092432 | 0.913872584 |
| 668 | 2089 | AGA | -0.716604584 | 0.916835296 |
| 32  | 100  | CAC | -2.748873439 | 0.920372714 |
| 732 | 2281 | ATC | -0.727846665 | 0.921638136 |
| 124 | 376  | ATC | -0.744778567 | 0.923542924 |
| 71  | 217  | TTA | -1.475283855 | 0.923862533 |
| 87  | 265  | CAG | -1.720445266 | 0.926454463 |
| 222 | 700  | AAA | -1.760872159 | 0.935358729 |
| 304 | 946  | GTA | -2.415085622 | 0.936216236 |
| 118 | 358  | CTA | -1.343012992 | 0.937856486 |
| 506 | 1603 | CAT | -0.908447245 | 0.938679169 |
| 645 | 2020 | AAT | -0.911966327 | 0.939406386 |
| 770 | 2395 | GAT | -0.912880746 | 0.939453615 |
| 771 | 2398 | GAT | -0.931030473 | 0.940712462 |

|     |      |     |              |             |
|-----|------|-----|--------------|-------------|
| 81  | 247  | TAT | -1.760159191 | 0.941355386 |
| 172 | 520  | AAG | -1.010785908 | 0.94351837  |
| 643 | 2014 | GTG | -1.865968153 | 0.944797242 |
| 55  | 169  | GAG | -1.053921114 | 0.946827352 |
| 647 | 2026 | AAA | -1.100816847 | 0.949354562 |
| 21  | 67   | GAA | -1.113925437 | 0.950590819 |
| 212 | 670  | GAA | -1.11531686  | 0.950672223 |
| 535 | 1690 | GAA | -1.11952509  | 0.950717816 |
| 670 | 2095 | GAA | -1.129760324 | 0.951578198 |
| 708 | 2209 | CCC | -2.479440543 | 0.952961741 |
| 54  | 166  | GAA | -1.150215676 | 0.953138559 |
| 709 | 2212 | CCT | -2.5         | 0.95473251  |
| 13  | 37   | GCT | -2           | 0.95473251  |
| 318 | 988  | AAT | -1.147146132 | 0.954886418 |
| 691 | 2158 | AAC | -1.146627883 | 0.954912415 |
| 768 | 2389 | AAC | -1.152495101 | 0.95522507  |
| 301 | 937  | AAG | -2.02384556  | 0.956761672 |
| 296 | 922  | TTC | -1.192153638 | 0.957260034 |
| 519 | 1642 | ACA | -2.572424427 | 0.957561842 |
| 560 | 1765 | GAG | -2.093228335 | 0.957970397 |
| 115 | 349  | AAC | -1.214513371 | 0.958349896 |
| 729 | 2272 | GTC | -2.114844723 | 0.959788855 |
| 418 | 1330 | CTC | -1.445056354 | 0.959954776 |
| 287 | 895  | GAC | -3.08409911  | 0.960435343 |
| 505 | 1600 | AAA | -2.186429582 | 0.961236956 |
| 145 | 439  | GGT | -1.503038776 | 0.962903748 |
| 34  | 106  | GCC | -1.5         | 0.962962963 |
| 136 | 412  | CCA | -1.5         | 0.962962963 |
| 704 | 2197 | CCT | -1.5         | 0.962962963 |
| 306 | 952  | GTT | -1.501452439 | 0.963034604 |
| 72  | 220  | AAG | -2.258172344 | 0.964206673 |
| 307 | 955  | GGT | -1.544114674 | 0.965065189 |
| 119 | 361  | AAT | -2.861195305 | 0.96769058  |
| 712 | 2221 | ATA | -3.037666227 | 0.969425367 |
| 664 | 2077 | GAT | -2.389914656 | 0.970001286 |
| 221 | 697  | ATT | -1.807910016 | 0.974970252 |
| 450 | 1426 | AAG | -2.995323816 | 0.976604813 |
| 633 | 1984 | ATG | -3.769188114 | 0.976934255 |
| 244 | 766  | ATC | -1.88734346  | 0.977241675 |
| 665 | 2080 | ATC | -1.890251582 | 0.977319785 |
| 448 | 1420 | ATG | 0.340988981  | 0.977548696 |
| 342 | 1060 | GGC | -4.681723029 | 0.981728893 |
| 320 | 994  | ATG | 0.339162611  | 0.982812735 |
| 719 | 2242 | GTT | -3.138271118 | 0.984506392 |
| 245 | 769  | AGT | -2.299231453 | 0.985592474 |
| 135 | 409  | AAT | -3.239433909 | 0.985796458 |
| 607 | 1906 | AAC | -3.238377078 | 0.986000996 |
| 549 | 1732 | AAC | -3.252748967 | 0.986171575 |
| 14  | 40   | GTA | -2.422164183 | 0.986401083 |
| 639 | 2002 | GAG | -2.521760261 | 0.987558754 |
| 162 | 490  | GCT | -2.5         | 0.987654321 |
| 330 | 1024 | GCA | -2.5         | 0.987654321 |
| 509 | 1612 | CCT | -2.5         | 0.987654321 |

|     |      |     |              |             |
|-----|------|-----|--------------|-------------|
| 603 | 1894 | GCA | -2.5         | 0.987654321 |
| 419 | 1333 | ACG | -2.504426442 | 0.987721361 |
| 678 | 2119 | TCC | -2.5443272   | 0.987869101 |
| 207 | 655  | CGC | -2.550074147 | 0.988249463 |
| 90  | 274  | ACA | -2.574744202 | 0.988730237 |
| 198 | 628  | AAT | -3.62096258  | 0.988828524 |
| 749 | 2332 | GAA | -2.669224231 | 0.988945953 |
| 364 | 1168 | TTT | -2.672198299 | 0.989854406 |
| 138 | 418  | GAA | -3.785923902 | 0.990055998 |
| 311 | 967  | ATG | 0.335281687  | 0.994188905 |
| 137 | 415  | CAA | -3.946011308 | 0.994396492 |
| 497 | 1576 | CAA | -4.110840631 | 0.994895282 |
| 544 | 1717 | GTT | -3.525424427 | 0.996005748 |
| 238 | 748  | AAT | -3.692701181 | 0.996570975 |
| 622 | 1951 | ATG | 0.334435503  | 0.996704387 |
| 323 | 1003 | GAC | -4.045957245 | 0.99717066  |
| 237 | 745  | ATG | 0.667561602  | 0.99732059  |
| 721 | 2248 | ATG | 0.334020217  | 0.997943586 |
| 474 | 1498 | CCC | -5.5         | 0.999542753 |
| 541 | 1708 | TTG | -2.090750441 | 1           |
| 487 | 1537 | ATT | -2.350923029 | 1           |
| 102 | 310  | GGG | -4           | 1           |
| 714 | 2227 | CTG | -1.2556022   | 1           |
| 160 | 484  | CTC | -1.921991027 | 1           |
| 589 | 1852 | ATC | -2.376355737 | 1           |
| 248 | 778  | GGA | -3           | 1           |
| 343 | 1063 | GAC | -3.241795176 | 1           |
| 453 | 1435 | GAG | -4.560673552 | 1           |
| 174 | 526  | CTG | -0.62398535  | 1           |
| 321 | 997  | CTA | -0.62398535  | 1           |
| 339 | 1051 | CTG | -0.62398535  | 1           |
| 413 | 1315 | CTG | -0.62398535  | 1           |
| 365 | 1171 | CTG | -0.6278011   | 1           |
| 688 | 2149 | CTG | -0.6278011   | 1           |
| 477 | 1507 | CTG | -0.628979124 | 1           |
| 266 | 832  | CTG | -0.642169286 | 1           |
| 210 | 664  | TTG | -0.702527382 | 1           |
| 269 | 841  | TTG | -0.702527382 | 1           |
| 236 | 742  | TTG | -0.702809227 | 1           |
| 146 | 442  | TTG | -0.707461657 | 1           |
| 27  | 85   | TTG | -0.708482504 | 1           |
| 430 | 1366 | TTA | -0.722408284 | 1           |
| 177 | 535  | TTA | -0.722428799 | 1           |
| 140 | 424  | TTA | -0.723510367 | 1           |
| 456 | 1444 | CGA | -0.810590405 | 1           |
| 228 | 718  | CTT | -0.960995513 | 1           |
| 142 | 430  | CTT | -0.971580936 | 1           |
| 536 | 1693 | CCC | -1           | 1           |
| 720 | 2245 | GTG | -1           | 1           |
| 2   | 4    | TCA | -1           | 1           |
| 19  | 55   | TCC | -1           | 1           |
| 103 | 313  | TCT | -1           | 1           |
| 214 | 676  | GTG | -1           | 1           |

|     |      |     |              |   |
|-----|------|-----|--------------|---|
| 223 | 703  | CCA | -1           | 1 |
| 241 | 757  | CCT | -1           | 1 |
| 250 | 784  | CTC | -1           | 1 |
| 251 | 787  | CCT | -1           | 1 |
| 252 | 790  | GCT | -1           | 1 |
| 256 | 802  | GGT | -1           | 1 |
| 260 | 814  | GGT | -1           | 1 |
| 264 | 826  | ACA | -1           | 1 |
| 309 | 961  | CCT | -1           | 1 |
| 319 | 991  | TCC | -1           | 1 |
| 324 | 1006 | CCA | -1           | 1 |
| 334 | 1036 | CCC | -1           | 1 |
| 335 | 1039 | ACA | -1           | 1 |
| 336 | 1042 | GCT | -1           | 1 |
| 340 | 1054 | GGG | -1           | 1 |
| 345 | 1111 | ACA | -1           | 1 |
| 346 | 1114 | GCT | -1           | 1 |
| 363 | 1165 | CCT | -1           | 1 |
| 373 | 1195 | GGA | -1           | 1 |
| 383 | 1225 | TCA | -1           | 1 |
| 384 | 1228 | CTT | -1           | 1 |
| 397 | 1267 | CTT | -1           | 1 |
| 408 | 1300 | ACA | -1           | 1 |
| 417 | 1327 | GCA | -1           | 1 |
| 421 | 1339 | GTT | -1           | 1 |
| 422 | 1342 | GGG | -1           | 1 |
| 443 | 1405 | CCC | -1           | 1 |
| 459 | 1453 | GTT | -1           | 1 |
| 466 | 1474 | CCC | -1           | 1 |
| 485 | 1531 | TCA | -1           | 1 |
| 516 | 1633 | TCA | -1           | 1 |
| 521 | 1648 | GCT | -1           | 1 |
| 522 | 1651 | GGA | -1           | 1 |
| 538 | 1699 | ACC | -1           | 1 |
| 545 | 1720 | GTA | -1           | 1 |
| 554 | 1747 | CCA | -1           | 1 |
| 556 | 1753 | CTC | -1           | 1 |
| 597 | 1876 | TCA | -1           | 1 |
| 619 | 1942 | GCA | -1           | 1 |
| 648 | 2029 | CCA | -1           | 1 |
| 656 | 2053 | GTC | -1           | 1 |
| 657 | 2056 | ACT | -1           | 1 |
| 674 | 2107 | GCC | -1           | 1 |
| 697 | 2176 | GGG | -1           | 1 |
| 751 | 2338 | CCT | -1           | 1 |
| 434 | 1378 | AGG | -1.120920929 | 1 |
| 52  | 160  | ATT | -1.130526226 | 1 |
| 666 | 2083 | ATT | -1.130652435 | 1 |
| 117 | 355  | ATT | -1.132955784 | 1 |
| 86  | 262  | ATT | -1.134793396 | 1 |
| 736 | 2293 | ATC | -1.231660104 | 1 |
| 595 | 1870 | CTA | -1.259697216 | 1 |
| 525 | 1660 | CTG | -1.26235091  | 1 |

|     |      |     |              |   |
|-----|------|-----|--------------|---|
| 698 | 2179 | ATA | -1.306535168 | 1 |
| 501 | 1588 | TGT | -1.341993485 | 1 |
| 438 | 1390 | TTT | -1.342512464 | 1 |
| 695 | 2170 | TTT | -1.342512464 | 1 |
| 225 | 709  | TAT | -1.345648619 | 1 |
| 472 | 1492 | TGT | -1.351271918 | 1 |
| 584 | 1837 | TAT | -1.351271918 | 1 |
| 229 | 721  | CAT | -1.353352136 | 1 |
| 479 | 1513 | CAT | -1.353352136 | 1 |
| 70  | 214  | TTT | -1.354145459 | 1 |
| 347 | 1117 | CAT | -1.354145459 | 1 |
| 375 | 1201 | CAT | -1.354145459 | 1 |
| 661 | 2068 | AAT | -1.354145459 | 1 |
| 181 | 547  | TAT | -1.358306695 | 1 |
| 752 | 2341 | TAT | -1.358306695 | 1 |
| 186 | 562  | AAT | -1.359050898 | 1 |
| 559 | 1762 | TTT | -1.359050898 | 1 |
| 625 | 1960 | TAC | -1.371883788 | 1 |
| 114 | 346  | TTG | -1.372271866 | 1 |
| 184 | 556  | TTG | -1.384392148 | 1 |
| 205 | 649  | TAC | -1.402405874 | 1 |
| 562 | 1771 | TTA | -1.407154846 | 1 |
| 224 | 706  | TTA | -1.443515617 | 1 |
| 356 | 1144 | GAT | -1.445958449 | 1 |
| 523 | 1654 | CAG | -1.498023075 | 1 |
| 92  | 280  | AAG | -1.498623063 | 1 |
| 18  | 52   | CAG | -1.500273995 | 1 |
| 431 | 1369 | GAG | -1.500273995 | 1 |
| 569 | 1792 | CAG | -1.500273995 | 1 |
| 20  | 64   | GAG | -1.500840688 | 1 |
| 99  | 301  | CAG | -1.501056458 | 1 |
| 495 | 1570 | CAG | -1.501056458 | 1 |
| 694 | 2167 | GAG | -1.501056458 | 1 |
| 74  | 226  | CAG | -1.502185128 | 1 |
| 235 | 739  | AAG | -1.502185128 | 1 |
| 298 | 928  | GAG | -1.502185128 | 1 |
| 187 | 565  | GAG | -1.502475163 | 1 |
| 446 | 1414 | CAG | -1.502475163 | 1 |
| 524 | 1657 | AAA | -1.513833021 | 1 |
| 164 | 496  | GAA | -1.566514897 | 1 |
| 416 | 1324 | CAA | -1.566514897 | 1 |
| 463 | 1465 | GAA | -1.566514897 | 1 |
| 610 | 1915 | GAA | -1.56796345  | 1 |
| 352 | 1132 | CAT | -1.614109231 | 1 |
| 49  | 151  | AAC | -1.632243047 | 1 |
| 690 | 2155 | GAC | -1.632243047 | 1 |
| 122 | 370  | AGC | -1.63331781  | 1 |
| 156 | 472  | TAC | -1.63331781  | 1 |
| 473 | 1495 | GAC | -1.63331781  | 1 |
| 739 | 2302 | CGG | -1.642130249 | 1 |
| 570 | 1795 | AAC | -1.643606936 | 1 |
| 679 | 2122 | CGG | -1.644543658 | 1 |
| 484 | 1528 | TAC | -1.652003967 | 1 |



|     |      |     |               |   |
|-----|------|-----|---------------|---|
| 240 | 754  | TAT | -1.652297979  | 1 |
| 315 | 979  | TTC | -1.652621623  | 1 |
| 414 | 1318 | CTC | -1.86648354   | 1 |
| 424 | 1348 | CTG | -1.871956049  | 1 |
| 693 | 2164 | CTA | -1.906757768  | 1 |
| 510 | 1615 | CTG | -1.926507859  | 1 |
| 37  | 115  | CTG | -1.966857443  | 1 |
| 681 | 2128 | CGT | -1.967175976  | 1 |
| 4   | 10   | TCT | -2            | 1 |
| 11  | 31   | CTT | -2            | 1 |
| 75  | 229  | TCC | -2            | 1 |
| 176 | 532  | CCA | -2            | 1 |
| 271 | 847  | GTT | -2            | 1 |
| 358 | 1150 | GCA | -2            | 1 |
| 360 | 1156 | GCT | -2            | 1 |
| 369 | 1183 | GGA | -2            | 1 |
| 370 | 1186 | GCT | -2            | 1 |
| 377 | 1207 | GCT | -2            | 1 |
| 379 | 1213 | GGG | -2            | 1 |
| 387 | 1237 | GCC | -2            | 1 |
| 388 | 1240 | ACA | -2            | 1 |
| 389 | 1243 | CCT | -2            | 1 |
| 423 | 1345 | ACT | -2            | 1 |
| 425 | 1351 | CCA | -2            | 1 |
| 440 | 1396 | GGG | -2            | 1 |
| 504 | 1597 | GCT | -2            | 1 |
| 518 | 1639 | TCT | -2            | 1 |
| 576 | 1813 | GGA | -2            | 1 |
| 621 | 1948 | GCT | -2            | 1 |
| 659 | 2062 | CCT | -2            | 1 |
| 671 | 2098 | GTT | -2            | 1 |
| 705 | 2200 | CCT | -2            | 1 |
| 718 | 2239 | GGA | -2            | 1 |
| 735 | 2290 | GGG | -2            | 1 |
| 774 | 2407 | ACC | -2            | 1 |
| 775 | 2410 | TCC | -2            | 1 |
| 95  | 289  | CTG | -2.08991542   | 1 |
| 392 | 1252 | TTA | -2.115429835  | 1 |
| 623 | 1954 | AGG | -2.290093086  | 1 |
| 649 | 2032 | AGA | -2.3144405279 | 1 |
| 279 | 871  | ATA | -2.515103144  | 1 |
| 458 | 1450 | ATA | -2.518814712  | 1 |
| 731 | 2278 | CTG | -2.554649335  | 1 |
| 410 | 1306 | ATA | -2.569760328  | 1 |
| 702 | 2191 | CTT | -2.575769597  | 1 |
| 149 | 451  | ATA | -2.585349066  | 1 |
| 391 | 1249 | CAT | -2.71085924   | 1 |
| 203 | 643  | TAT | -2.718821881  | 1 |
| 482 | 1522 | AAT | -2.719878503  | 1 |
| 750 | 2335 | AAT | -2.720771708  | 1 |
| 51  | 157  | AAT | -2.721755314  | 1 |
| 582 | 1831 | AGT | -2.754219154  | 1 |
| 492 | 1561 | TAC | -2.844917013  | 1 |

|     |      |     |              |   |
|-----|------|-----|--------------|---|
| 106 | 322  | CTC | -2.874596214 | 1 |
| 153 | 463  | AGT | -2.921290001 | 1 |
| 53  | 163  | ACT | -3           | 1 |
| 351 | 1129 | GGG | -3           | 1 |
| 499 | 1582 | GCA | -3           | 1 |
| 552 | 1741 | GTA | -3           | 1 |
| 561 | 1768 | CCC | -3           | 1 |
| 667 | 2086 | CCT | -3           | 1 |
| 701 | 2188 | ACA | -3           | 1 |
| 209 | 661  | CAG | -3.030014066 | 1 |
| 192 | 580  | AAT | -3.047020271 | 1 |
| 94  | 286  | CAG | -3.098241605 | 1 |
| 409 | 1303 | GAA | -3.125029194 | 1 |
| 652 | 2041 | TTT | -3.13418299  | 1 |
| 441 | 1399 | GAA | -3.135476713 | 1 |
| 594 | 1867 | AGC | -3.227694355 | 1 |
| 31  | 97   | AAC | -3.227849303 | 1 |
| 338 | 1048 | GAC | -3.241203493 | 1 |
| 405 | 1291 | GAC | -3.250037303 | 1 |
| 686 | 2143 | TTC | -3.250037303 | 1 |
| 654 | 2047 | TTC | -3.262787677 | 1 |
| 428 | 1360 | TAC | -3.270421297 | 1 |
| 332 | 1030 | TGC | -3.276643921 | 1 |
| 514 | 1627 | GAC | -3.281886072 | 1 |
| 167 | 505  | AGA | -3.412672406 | 1 |
| 353 | 1135 | ATC | -3.711562005 | 1 |
| 460 | 1456 | GGG | -4           | 1 |
| 475 | 1501 | GCA | -4           | 1 |
| 579 | 1822 | ACC | -4           | 1 |
| 257 | 805  | GAT | -4.03408284  | 1 |
| 636 | 1993 | TTT | -4.131659905 | 1 |
| 609 | 1912 | AAT | -4.146882965 | 1 |
| 218 | 688  | TTT | -4.149161717 | 1 |
| 756 | 2353 | GAT | -4.495614034 | 1 |
| 180 | 544  | GAG | -4.506889929 | 1 |
| 354 | 1138 | CAG | -4.532824012 | 1 |
| 604 | 1897 | TAT | -4.606387891 | 1 |
| 404 | 1288 | GAA | -4.687728497 | 1 |
| 333 | 1033 | CAT | -4.812533275 | 1 |
| 139 | 421  | TGC | -4.87154412  | 1 |
| 246 | 772  | CCA | -5           | 1 |
| 299 | 931  | GCC | -5           | 1 |
| 583 | 1834 | CCA | -5           | 1 |
| 641 | 2008 | GTG | -5           | 1 |
| 131 | 397  | TGT | -5.573671016 | 1 |
| 508 | 1609 | GGC | -6           | 1 |
| 540 | 1705 | GCA | -6           | 1 |
| 348 | 1120 | CAT | -6.183511617 | 1 |

**Supplementary Table S3. B.** Detection of positions in the ACE2 sequence alignment that are likely to experience episodic positive selection (the MEME program).

| <b>Position</b> | <b><i>p</i>-Value</b> |
|-----------------|-----------------------|
| 65              | <0.01                 |
| 214             | <0.01                 |
| 359             | <0.01                 |
| 26              | 0.01                  |
| 93              | 0.01                  |
| 156             | 0.01                  |
| 429             | 0.01                  |
| 658             | 0.02                  |
| 740             | 0.02                  |
| 78              | 0.02                  |
| 343             | 0.02                  |
| 470             | 0.02                  |
| 657             | 0.02                  |
| 675             | 0.03                  |
| 782             | 0.04                  |
| 67              | 0.04                  |
| 206             | 0.05                  |
| 420             | 0.05                  |
